# Supplementary material for: Identification of Disparities in Personalized Cancer Care—A Joint Approach of the German WERA Consortium
Source: MDPI journal article supplement (doi:10.3390/cancers14205040), 2022-10-14
Supplement: s1 [file s1]

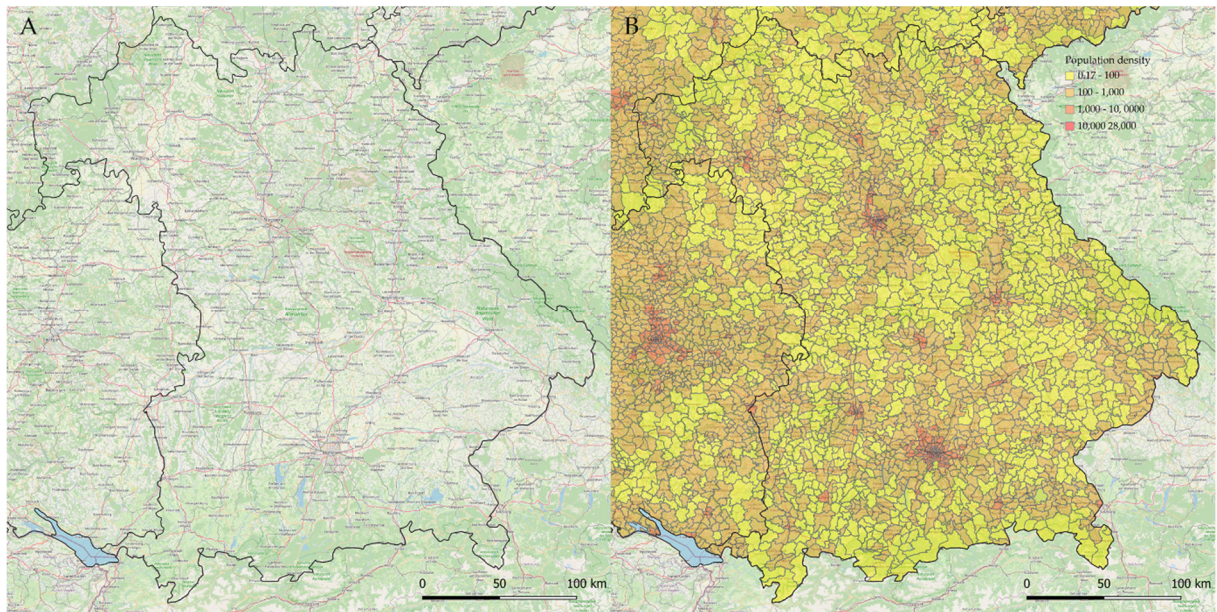

**Figure S1.** (A): Map of Bavaria and Southern Germany; (B): population density shown as 100,000 inhabitants per square kilometer and postal code area.



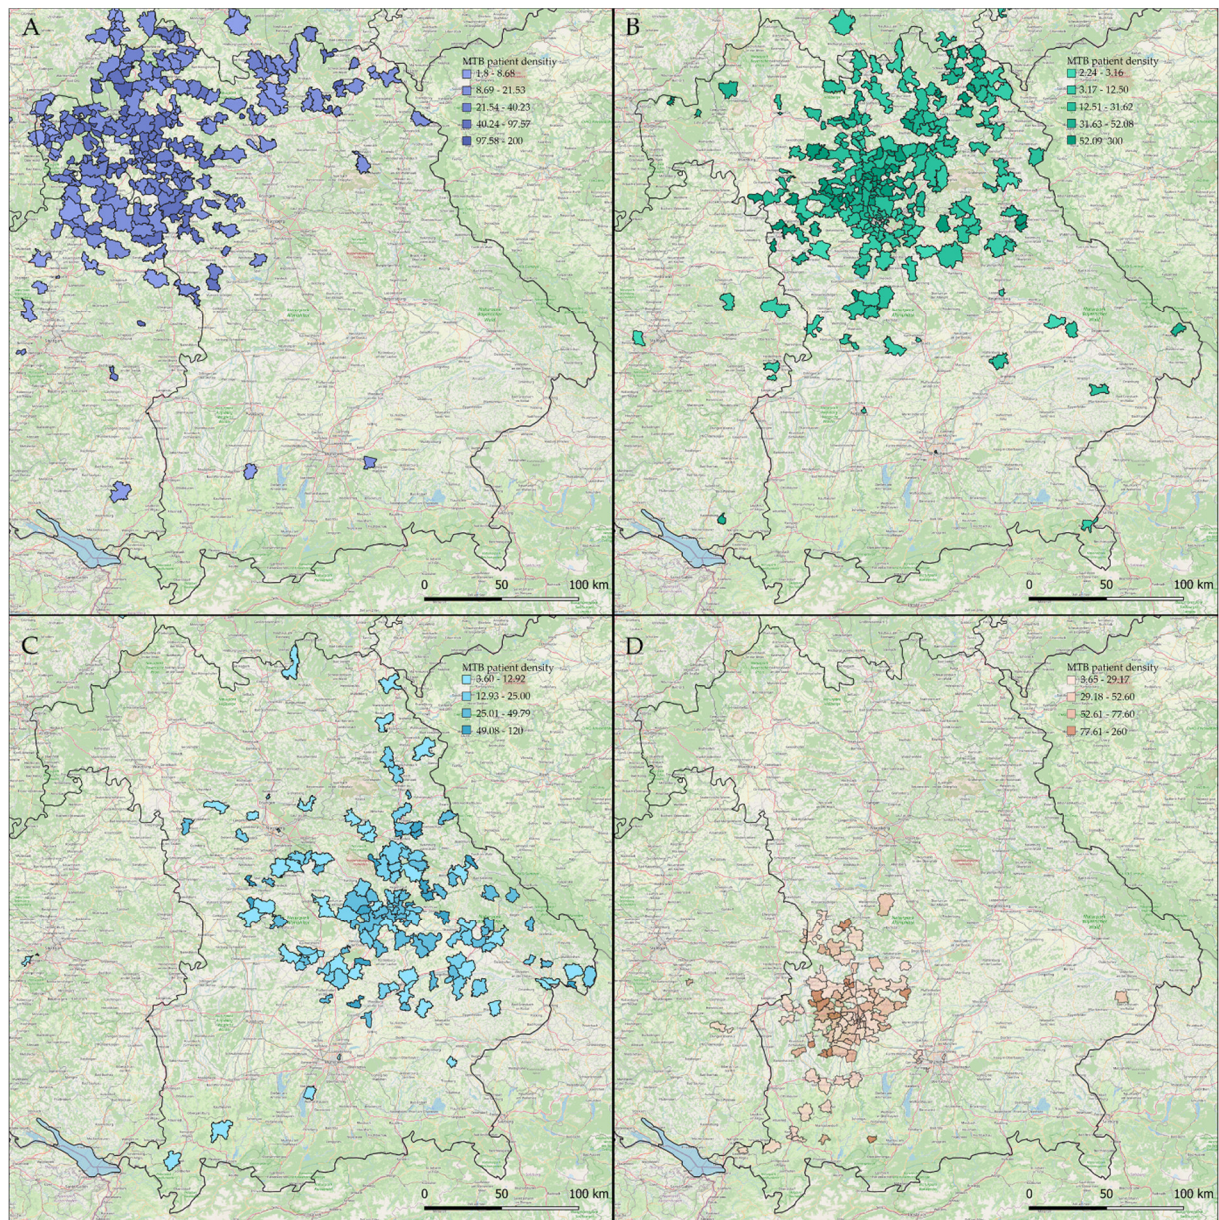

**Figure S2.** Distribution of WERA MTB patients in 2020 and 2021 per 100,000 inhabitants; (A–D) individual patient density for each center, (A) Würzburg, (B) Erlangen, (C) Regensburg, (D) Augsburg.
